# Supplementary material for: BSTA: a targeted approach combines bulked segregant analysis with next- generation sequencing and de novo transcriptome assembly for SNP discovery in sunflower
Source: PubMed Central journal article supplement (PMC3848877; doi:10.1186/1471-2164-14-628), 2013-09-17
Supplement: 1471-2164-14-628-S1.pdf [file 1471-2164-14-628-S1.pdf]

**Table S1 – Composition of the resistant bulk BR**

Graphical genotypes of BR containing 16 progenies in (cms)HA342xARG1575-2 and their marker scores are shown. Abbreviations are explained at the end of the table.

| F2/F3 progeny | CRT<br>272 | ORS<br>543 | ORS<br>1128 | ORS<br>1182 | ORS<br>610 | ORS<br>509 | Target region |            |            |            |           |           |           | ORS<br>053 | ORS<br>959 | ORS<br>371 |   |
|---------------|------------|------------|-------------|-------------|------------|------------|---------------|------------|------------|------------|-----------|-----------|-----------|------------|------------|------------|---|
|               |            |            |             |             |            |            | ORS<br>662    | ORS<br>716 | $PI_{ARG}$ | RGC<br>151 | HT<br>722 | HT<br>446 | HT<br>324 |            |            |            |   |
| 1 4001-016    | B          | B          | B           | B           | B          | B          | B             | B          | B          | B          | B         | B         | B         | B          | H          | H          | H |
| 2 4004-033    | B          | B          | B           | B           | B          | B          | B             | B          | B          | B          | B         | B         | B         | B          | H          | H          | H |
| 3 4005-112    | H          | H          | H           | H           | B          | B          | B             | B          | B          | B          | B         | B         | B         | B          | B          | B          | B |
| 4 4005-155    | B          | B          | B           | B           | B          | B          | B             | B          | B          | B          | B         | B         | B         | H          | H          | H          | H |
| 5 4006-012    | H          | H          | H           | H           | B          | B          | B             | B          | B          | B          | B         | B         | B         | B          | B          | B          | B |
| 6 4006-072    | B          | B          | B           | B           | B          | B          | B             | B          | B          | B          | B         | B         | B         | B          | H          | H          | H |
| 7 4007-083    | B          | B          | B           | B           | B          | B          | B             | B          | B          | B          | B         | B         | B         | B          | H          | H          | H |
| 8 4007-096    | B          | B          | B           | B           | B          | B          | B             | B          | n.d.       | B          | B         | B         | B         | B          | H          | H          | H |
| 9 697         | B          | B          | B           | B           | B          | B          | B             | B          | n.d.       | B          | B         | B         | B         | B          | H          | H          | H |
| 10 781        | B          | B          | B           | B           | B          | B          | B             | B          | B          | B          | B         | B         | B         | B          | H          | H          | H |
| 11 1071       | B          | B          | B           | B           | B          | B          | B             | B          | B          | B          | B         | B         | B         | B          | H          | H          | H |
| 12 1092       | B          | B          | B           | B           | B          | B          | B             | B          | n.d.       | B          | B         | B         | B         | B          | H          | H          | H |
| 13 2473       | B          | B          | B           | B           | B          | B          | B             | B          | B          | B          | B         | B         | B         | B          | H          | H          | H |
| 14 2304       | B          | B          | B           | B           | B          | B          | B             | B          | B          | B          | B         | B         | B         | A          | A          | A          | A |
| 15 2105       | A          | A          | A           | A           | A          | A          | A             | B          | B          | B          | B         | B         | B         | B          | n.d.       | B          | B |
| 16 2313       | A          | A          | A           | A           | A          | A          | A             | B          | B          | B          | B         | B         | B         | B          | B          | B          | B |

yellow/ A: (cms)HA342 allele

green / B: ARG1575-2 allele

grey / H: heterozygous

n.d.: not determined
