# Supplementary material for: BSTA: a targeted approach combines bulked segregant analysis with next- generation sequencing and de novo transcriptome assembly for SNP discovery in sunflower
Source: PubMed Central journal article supplement (PMC3848877; doi:10.1186/1471-2164-14-628), 2013-09-17
Supplement: 1471-2164-14-628-S2.pdf [file 1471-2164-14-628-S2.pdf]

**Table S2 – Composition of the susceptible bulk BS**

Graphical genotypes of BS containing 16 progenies in (cms)HA342xARG1575-2 and their marker scores are shown. Abbreviations are explained at the end of the table.

| F2 progeny | CRT<br>272 | ORS<br>543 | ORS<br>1128 | ORS<br>1182 | ORS<br>610 | ORS<br>509 | Target region |            |               |            |           |           |           | ORS<br>053 | ORS<br>959 | ORS<br>371 |
|------------|------------|------------|-------------|-------------|------------|------------|---------------|------------|---------------|------------|-----------|-----------|-----------|------------|------------|------------|
|            |            |            |             |             |            |            | ORS<br>662    | ORS<br>716 | $P_{I_{ARG}}$ | RGC<br>151 | HT<br>722 | HT<br>446 | HT<br>324 |            |            |            |
| 1 4006-056 | A          | A          | A           | A           | A          | A          | A             | A          | n.d.          | A          | A         | A         | H         | H          | H          | H          |
| 2 4007-006 | A          | A          | A           | A           | A          | A          | A             | A          | n.d.          | A          | A         | A         | H         | H          | H          | H          |
| 3 4007-034 | A          | A          | A           | A           | A          | A          | A             | A          | A             | A          | A         | A         | A         | H          | H          | H          |
| 4 4007-126 | A          | A          | A           | A           | A          | A          | A             | A          | A             | A          | A         | A         | H         | H          | H          | H          |
| 5 4008-120 | A          | A          | A           | A           | A          | A          | A             | A          | A             | A          | A         | A         | A         | H          | H          | H          |
| 6 4008-195 | A          | A          | A           | A           | A          | A          | A             | A          | n.d.          | A          | A         | A         | A         | H          | H          | H          |
| 7 4010-007 | A          | A          | A           | A           | A          | A          | A             | A          | A             | A          | A         | A         | A         | H          | H          | H          |
| 8 4010-034 | A          | A          | A           | A           | A          | A          | A             | A          | n.d.          | A          | A         | A         | A         | H          | H          | H          |
| 9 4010-199 | A          | A          | A           | A           | A          | A          | A             | A          | A             | A          | A         | A         | A         | H          | H          | H          |
| 10 390     | A          | A          | A           | A           | A          | A          | A             | A          | A             | A          | A         | A         | A         | H          | H          | H          |
| 11 1010    | A          | A          | A           | A           | A          | A          | A             | A          | A             | A          | A         | A         | A         | H          | H          | H          |
| 12 1343    | A          | A          | A           | A           | A          | A          | A             | A          | A             | A          | A         | A         | A         | H          | H          | H          |
| 13 1731    | A          | A          | A           | A           | A          | A          | A             | A          | A             | A          | A         | A         | A         | H          | H          | H          |
| 14 2127    | A          | A          | A           | A           | A          | A          | A             | A          | A             | A          | A         | A         | A         | H          | H          | H          |
| 15 2245    | A          | A          | A           | A           | A          | A          | A             | A          | A             | A          | A         | A         | H         | H          | H          | H          |
| 16 2394    | A          | A          | A           | A           | A          | A          | A             | A          | A             | A          | A         | A         | A         | H          | H          | H          |

yellow / A: (cms)HA342 allele

grey / H: heterozygous

n.d.: not determined
