# Supplementary material for: BSTA: a targeted approach combines bulked segregant analysis with next- generation sequencing and de novo transcriptome assembly for SNP discovery in sunflower
Source: PubMed Central journal article supplement (PMC3848877; doi:10.1186/1471-2164-14-628), 2013-09-17

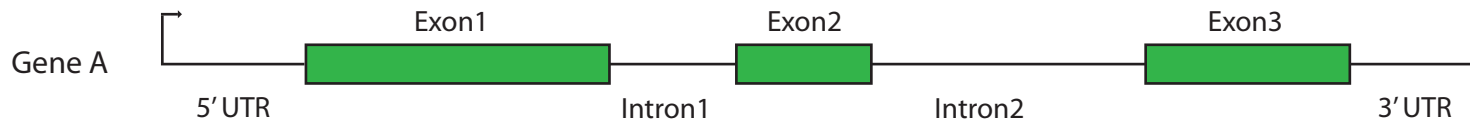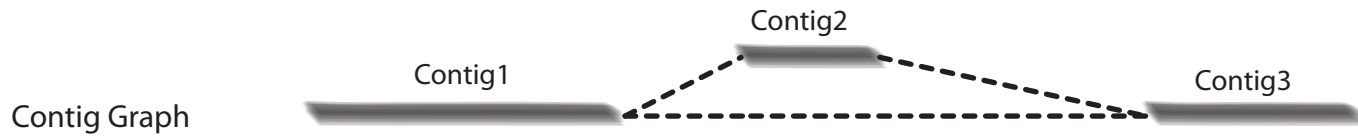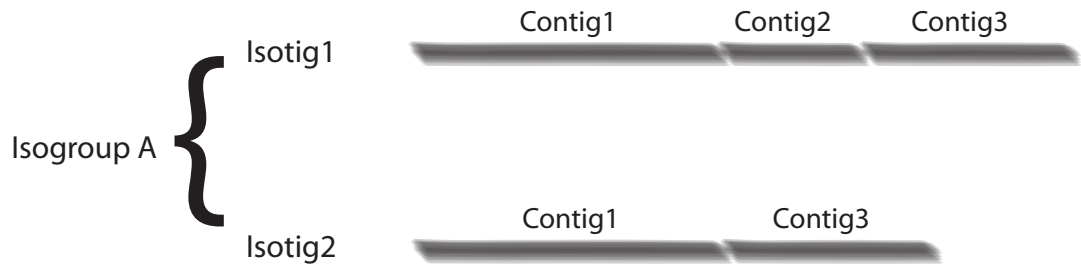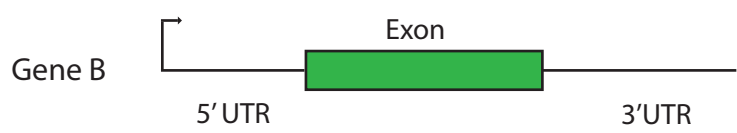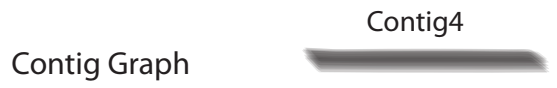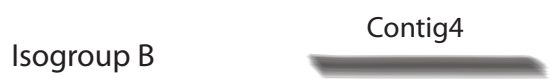

Supplement: 1471-2164-14-628-S3.pdf [file 1471-2164-14-628-S3.pdf]
