# Supplementary material for: BSTA: a targeted approach combines bulked segregant analysis with next- generation sequencing and de novo transcriptome assembly for SNP discovery in sunflower
Source: PubMed Central journal article supplement (PMC3848877; doi:10.1186/1471-2164-14-628), 2013-09-17
Supplement: 1471-2164-14-628-S4.pdf [file 1471-2164-14-628-S4.pdf]

**Table S3 – List of PCR primers and restriction enzymes for CAPS marker analysis**

Primers designed on *de novo* BRBS assembly of cDNA sequences derived from the susceptible (BS) and the resistant bulk (BR). Marker names, primer pair sequences, and expected fragment sizes are given. Additionally, restriction enzymes used for CAPS marker analysis are listed.

| Marker name | Forward primer<br>(5'-3') | Reverse primer<br>(5'-3') | Expected fragment size<br>(bp) | Restriction enzyme |
|-------------|---------------------------|---------------------------|--------------------------------|--------------------|
| iso06869    | TGGATCGTGTTCTTGCTCTCT     | CGACACATTACTCGCCAAACT     | 707                            | <i>NciI</i>        |
| iso14249    | CTGCAATTTTAGACCCGGTAGAT   | GGTTCAAGCTCAGGTCAAGATAGT  | 684                            | <i>BstNI</i>       |
| iso15198    | GGAACCCGGTCTGCAATAC       | CCGAGAAATCATACGGCATT      | 465                            | <i>MboII</i>       |
| iso15967    | CACAAACCGTGTCATAGACTTTTC  | AGCCTTCTGATCGATACTTGAGTT  | 746                            | <i>BstUI</i>       |
| iso33812    | TACCCGAGGGTATGTTTGAGC     | GCTTGAAATATGCCTCTATCG     | 1300                           | <i>HpaII</i>       |
| iso35499    | AGCGTTGTTGATGCACTGTT      | ATGCCCGATTGTGTGAAAAG      | 674                            | <i>AciI</i>        |
